# Supplementary material for: A novel melittin nano-liposome exerted excellent anti-hepatocellular carcinoma efficacy with better biological safety
Source: Springer Nature journal article supplement (doi:10.1186/s13045-017-0442-y), 2017-03-20

a

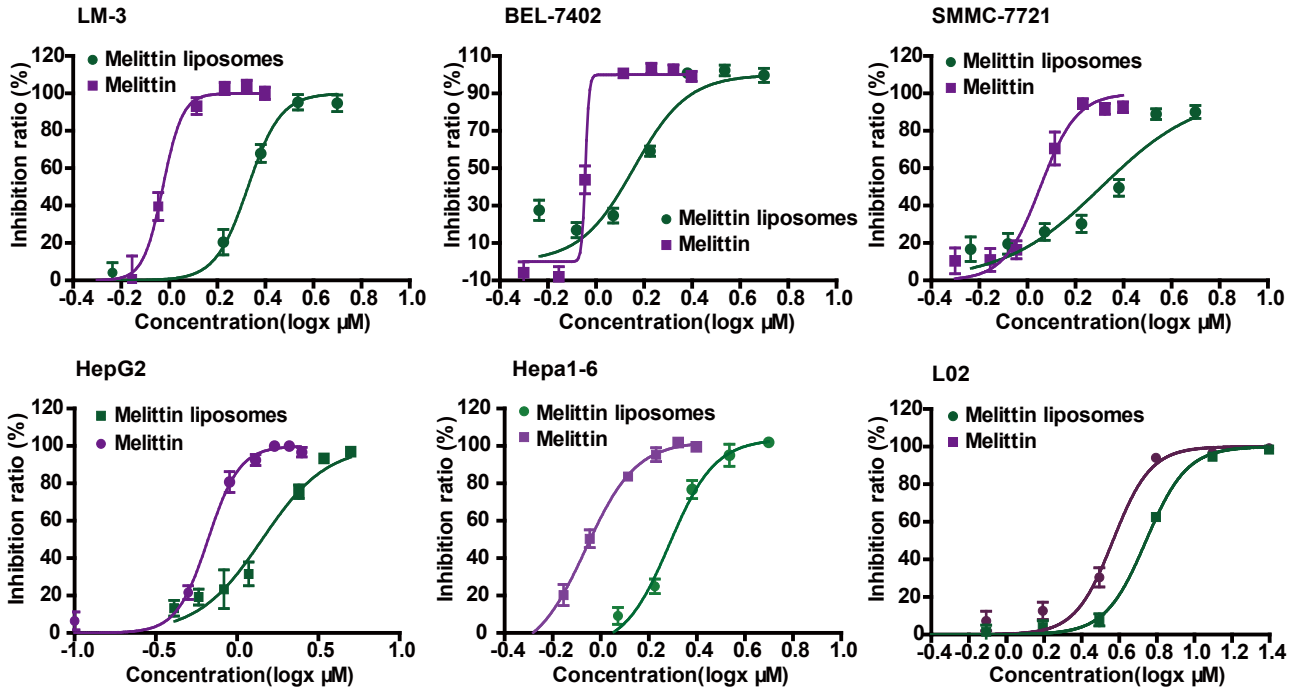

| Cell lines | Mel ( $\mu\text{M}$ ) | Mel-lipo ( $\mu\text{M}$ ) |
|------------|-----------------------|----------------------------|
| LM-3       | 0.94                  | 2.13                       |
| Bel-7402   | 0.90                  | 1.44                       |
| SMMC-7721  | 1.13                  | 2.03                       |
| HepG2      | 0.66                  | 2.19                       |
| Hepa 1-6   | 0.87                  | 1.93                       |
| L02        | 3.69                  | 5.54                       |

b Bel-7402 cells

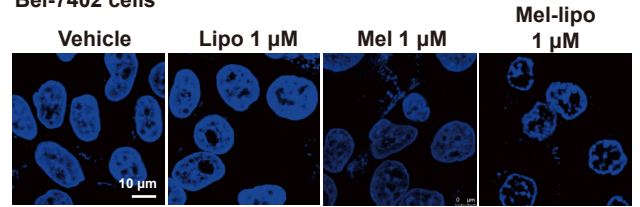

SMMC-7721 cells

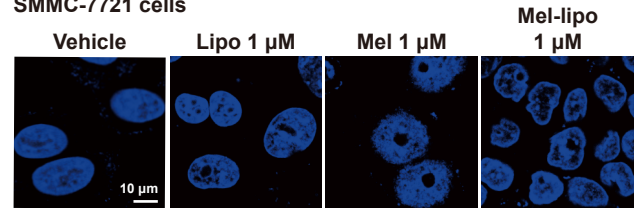

c HepG2 cells

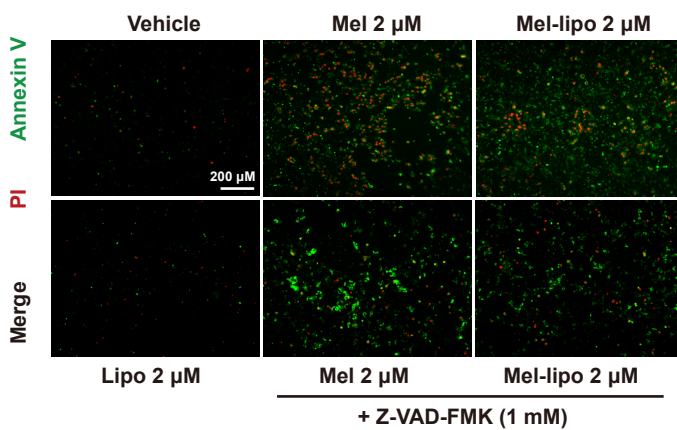

Apoptosis cell count

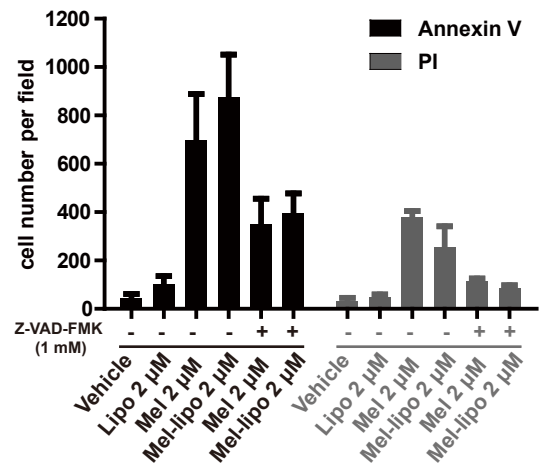

Supplement: MOESM2 [file 12157824]
