# Supplementary material for: A novel melittin nano-liposome exerted excellent anti-hepatocellular carcinoma efficacy with better biological safety
Source: Springer Nature journal article supplement (doi:10.1186/s13045-017-0442-y), 2017-03-20

Subcutaneous transplanted tumors of HepG2 cells

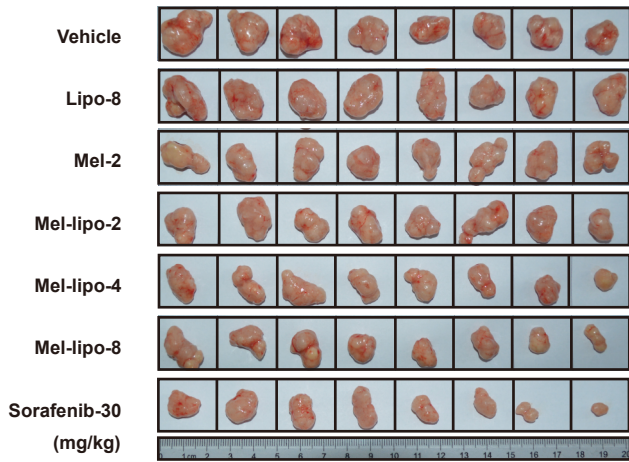

Tumor weight of HepG2 model

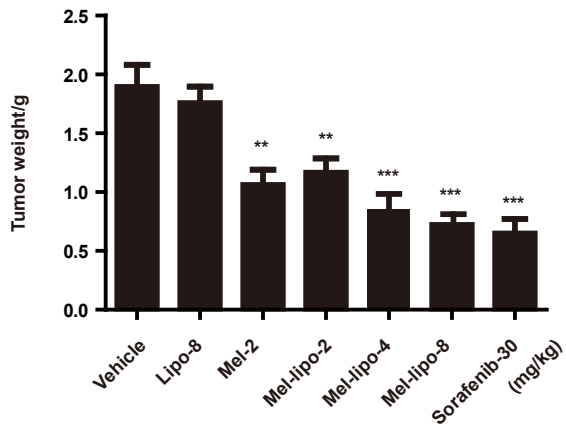

Supplement: MOESM3 [file 12157824]
