# Supplementary material for: A novel melittin nano-liposome exerted excellent anti-hepatocellular carcinoma efficacy with better biological safety
Source: Springer Nature journal article supplement (doi:10.1186/s13045-017-0442-y), 2017-03-20

Splenic T lymphocytes

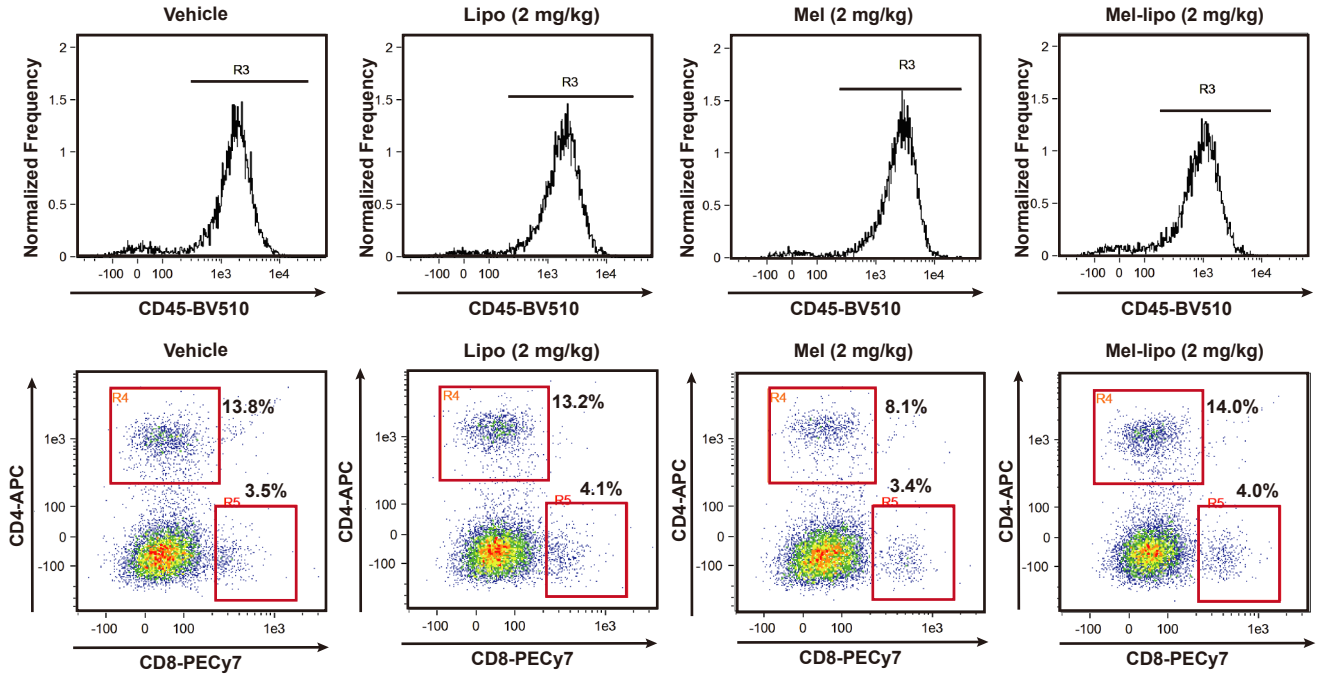

Splenic neutrophil

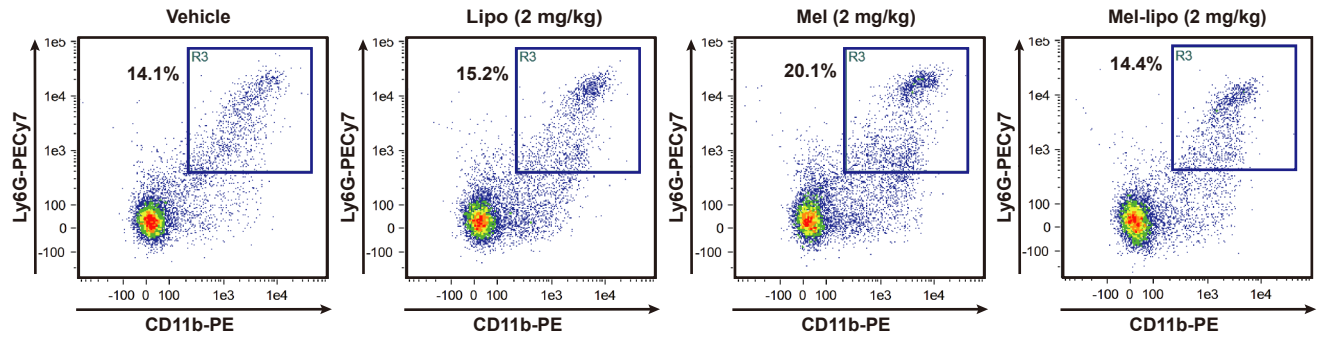

Splenic B lymphocytes

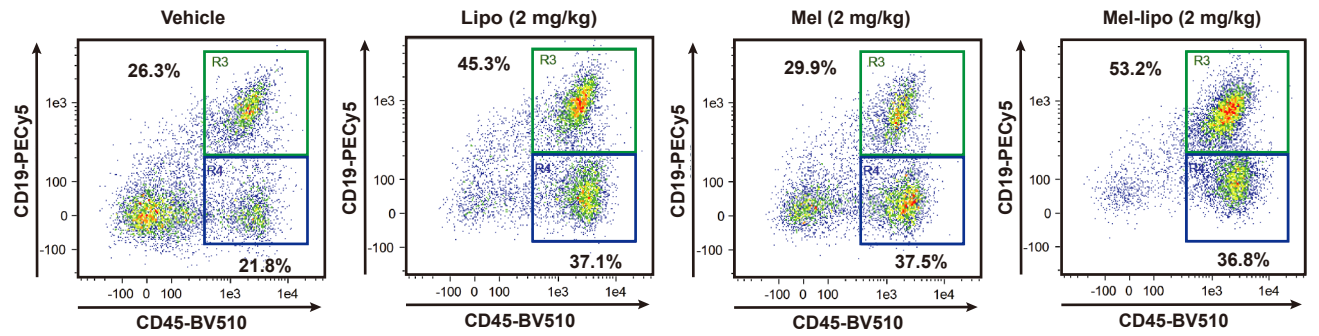

Supplement: MOESM4 [file 12157824]
